# Supplementary material for: DNA barcode-based delineation of putative species: efficient start for taxonomic workflows
Source: PubMed Central journal article supplement (PMC4264940; doi:10.1111/1755-0998.12233), 2014-03-10

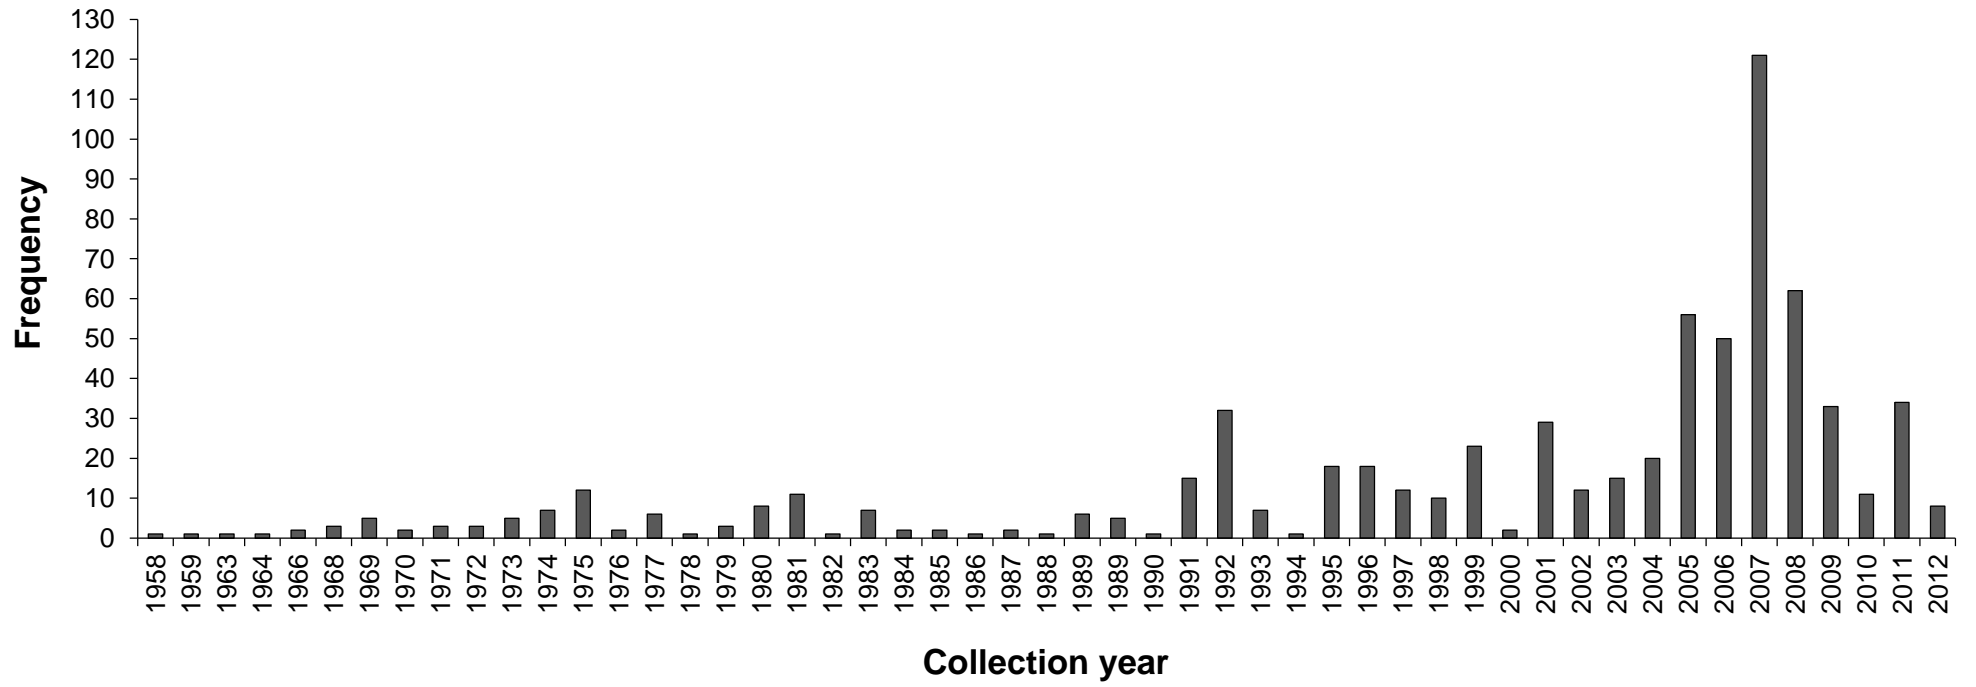

Supplement: men0014-0706-SD5.pdf [file men0014-0706-SD5.pdf]
